# Supplementary material for: N-Nonyloxypentyl-l-Deoxynojirimycin Inhibits Growth, Biofilm Formation and Virulence Factors Expression of Staphylococcus aureus
Source: PubMed Central journal article supplement (PMC7344813; doi:10.3390/antibiotics9060362), 2020-06-26
Supplement: antibiotics-09-00362-s001.pdf [file antibiotics-09-00362-s001.pdf]

## Supplementary Materials

**Table S1.** Antibiotic susceptibility of clinical isolates used in this study.

| Strain                      | Oxacillin  | Levofloxacin | Erythromycin | Linezolid | Daptomycin | Teicoplanin | Vancomycin | Tetracycline | Fosfomycin | Rifampicin | Clindamycin | Tigecycline | Gentamicin | Ciprofloxacin |
|-----------------------------|------------|--------------|--------------|-----------|------------|-------------|------------|--------------|------------|------------|-------------|-------------|------------|---------------|
| <i>S. aureus</i> ATCC 29213 | 0,125 (S)  | 0,125        | <0,5 (S)     | 0,5 (S)   | ND         | ND          | 1 (S)      | 0,5 (S)      | 1 (S)      | 0,016 (S)  | <0,125 (S)  | ND          | 0, 5 (S)   | ND            |
| <i>S. aureus</i> 00717      | 128 (R)    | >4 (R)       | >4 (R)       | 2 (S)     | 0,25 (S)   | <0,5 (S)    | 1 (S)      | <1 (S)       | >64 (R)    | >2 (R)     | 0,25 (R)    | <0,12 (S)   | 256 (R)    | ND            |
| <i>S. aureus</i> 60338      | >2 (R)     | ND           | >2 (R)       | 2 (S)     | <0,5 (S)   | <=0,5 (S)   | <=0,5 (S)  | <=0,5 (S)    | >64 (R)    | <0,25 (S)  | 0,25 (R)    | <=0,25 (S)  | <=1 (S)    | >4 (R)        |
| <i>S. aureus</i> 60419      | <=0,25 (S) | ND           | >2 (R)       | 1 (S)     | <0,5 (S)   | <=0,5 (S)   | 1 (S)      | >2 (R)       | <16 (S)    | ND         | 0,25 (R)    | 0,5 (S)     | >4 (R)     | >4 (R)        |
| <i>S. aureus</i> 61030      | 2 (R)      | ND           | >2 (R)       | 1 (S)     | <0,5 (S)   | <0,5 (S)    | <=0,5 (S)  | <=0,5 (S)    | <16 (S)    | <0,5 (S)   | 0,25 (R)    | <=0,25 (S)  | <=1 (S)    | >4 (R)        |
| <i>S. aureus</i> 61035      | >2 (R)     | >4 (R)       | >4 (R)       | 2 (S)     | 0,5 (S)    | <=0,5 (S)   | <=0,5 (S)  | <1 (S)       | >64 (R)    | <0,03 (S)  | 0,25 (R)    | 0,25 (S)    | <=0, 5 (S) | >4 (R)        |
| <i>S. aureus</i> 61050      | >2 (R)     | <=0,12 (S)   | >4 (R)       | 2 (S)     | 0,25 (S)   | <=0,5 (S)   | <=0,5 (S)  | >8 (R)       | ND         | <0,03 (S)  | 0,25 (R)    | <=0,12 (S)  | <=0, 5 (S) | ND            |
| <i>S. aureus</i> 61486      | >2 (R)     | >4 (R)       | 1 (S)        | 2 (S)     | 0,5 (S)    | <=0,5 (S)   | <=0,5 (S)  | <1 (S)       | >64 (R)    | <0,03 (S)  | 0,25 (R)    | 0,25 (S)    | <=0, 5 (S) | >4 (R)        |
| <i>S. aureus</i> 62482      | >2 (R)     | ND           | >2 (R)       | 2 (S)     | 1 (S)      | <=0,5 (S)   | 1 (S)      | >2 (R)       | <16 (S)    | ND         | 0,25 (R)    | <=0,25 (S)  | >4 (R)     | 1 (S)         |
| <i>S. aureus</i> 63906      | >2 (R)     | >1 (R)       | 0,5 (S)      | 2 (S)     | 1 (S)      | 1 (S)       | 1 (S)      | <=0,5 (S)    | >64 (R)    | <0,25 (S)  | <0,25 (S)   | <=0,25 (S)  | <=1 (S)    | >4 (R)        |
| <i>S. aureus</i> 64428      | <=0,25 (S) | >1 (R)       | >4 (R)       | 2 (S)     | 1 (S)      | <=0,5 (S)   | 1 (S)      | <1 (S)       | <16 (S)    | <0,03 (S)  | 0,25 (R)    | <=0,12 (S)  | <=0, 5 (S) | >4 (R)        |

The MIC values were expressed as µg/mL. MICs were determined by BD Phoenix PMIC/ID-88 panel. The categorical interpretations were as follows: S, susceptible; R, resistant; ND, not determined.

**Table S2.** MIC (µg/mL) and MBC (µg/mL) values of L-NPDNJ for clinical isolates used in this study.

| Strain                      | MIC | MBC |
|-----------------------------|-----|-----|
| <i>S. aureus</i> ATCC 29213 | 128 | 256 |
| <i>S. aureus</i> 00717      | 128 | 256 |
| <i>S. aureus</i> 60338      | 128 | 256 |
| <i>S. aureus</i> 60419      | 128 | 256 |
| <i>S. aureus</i> 61030      | 128 | 256 |
| <i>S. aureus</i> 61035      | 128 | 256 |
| <i>S. aureus</i> 61050      | 128 | 256 |
| <i>S. aureus</i> 61486      | 128 | 256 |
| <i>S. aureus</i> 62482      | 128 | 256 |
| <i>S. aureus</i> 63906      | 128 | 256 |
| <i>S. aureus</i> 64428      | 128 | 256 |
